# Supplementary material
Source: publisher figshare collection journal article supplement (https://wellcome.figshare.com/ndownloader/files/15434681)
Supplement: Supplementary file 1 [file 15434681]

## Sheet: WT-clin-trials-post-May18
Required to comply with May18 policy	Grant code	Trial Title	Grantholder Organisation	Grant Type	Grant Start Date	Grant End Date	Trial registry ID	Trial registry	Trial start date	Trial end date	APR or EoG report 2018-19	Protocol available	SAP available	Summary results posted	Plan to share IPD	Wellcome listed as a funder/collaborator on registry?	Grant no listed on registry?
No	079113/Z/06/Z	Transdiagnostic cognitive behaviour therapy for eating disorders: efficacy and mechanisms of action	University of Oxford	Principal Research Fellowship Renewal	2006-10-01	2018-12-31	ISRCTN15562271	ISRCTN Registry	2001-10-01	2014-10-15				N	Not provided	Y	Y
No	106698/Z/14/Z	Impact of malaria infection in pregnancy on fetal and newborn growth	MORU	Africa and Asia Programmes	2015-01-01	2020-12-31	NCT00840502	ClinicalTrials.gov	2009-02-01	2019-09-30						N	N
No	106698/Z/14/Z	Fixed dose and extended course ACTs for the treatment of uncomplicated malaria in pregnancy	MORU	Africa and Asia Programmes	2015-01-01	2020-12-31	NCT01054248	ClinicalTrials.gov	2010-02-16	2020-01-31						N	N
No	106698/Z/14/Z	A comparison between 12 vs. 20 weeks of co-trimoxazole as maintenance therapy for Melioidosis	MORU	Africa and Asia Programmes	2015-01-01	2020-12-31	NCT01420341	ClinicalTrials.gov	2011-08-01	2019-06-30						N	N
No	089725/B/09/Z	International Programme to evaluate the Polycap in a large randomised controlled clinical trial in a primary prevention setting (TIPS)	Hamilton Health Sciences Corporation	Affordable Healthcare in India Award	2010-01-01	2021-01-10	NCT01646437	ClinicalTrials.gov	2012-06-01	2019-06-30				N	Undecided	Y	N
No	203077/Z/16/Z	TRACT	KEMRI	Africa and Asia Programmes	2015-01-01	2020-12-31	ISRCTN84086586	ISRCTN Registry	2013-01-01	2019-12-31	Y	Yes		N		N	N
No	101103/Z/13/Z	A Single-blind Stepped Wedge Cluster Randomized Controlled Behaviour Change Trial to Determine Effec	University of Oxford	International Intermediate Fellowship - Full	2013-09-01	2019-08-31	NCT02089152	ClinicalTrials.gov	2014-04-01	2019-06-30				N	Not provided	Y	Y
No	104803/Z/14/Z	Host directed therapies against tuberculosis	Imperial College London	Senior Research Fellowship Clinical Renewal	2014-10-01	2019-09-30	NCT01755598	ClinicalTrials.gov	2014-08-19	2018-11-16	Y	not listed	not listed	N	Not provided	N	N
No	106698/Z/14/Z	A randomised controlled study of the use of recovery positions for comatose patients in Bangladesh	MORU	Africa and Asia Programmes	2015-01-01	2020-12-31	NCT02427633	ClinicalTrials.gov	2014-08-23	2019-05-31				N		N	N
No	095564/Z/11/Z	TRIAC in MCT8 deficiency	University of Cambridge	Investigator Award in Science	2011-08-01	2018-07-31	NCT02060474	ClinicalTrials.gov	2014-10-01	2018-06-26				N	Not provided	N	N
No	106698/Z/14/Z	A prospective cohort study on the etiology of neonatal hyperbilirubinemia	MORU	Africa and Asia Programmes	2015-01-01	2020-12-31	NCT02361788	ClinicalTrials.gov	2015-02-01	2019-09-30				N		N	N
No	102568/Z/13/Z	Albumin to prevent infection in Acute-on-Chronic Liver Failure (Acronym: ATTIRE Albumin To prevenT Infection in liveR failurE)	University College London	Health Innovation Challenge Fund Award	2014-10-01	2019-08-31	EU-CTR 2014-002300-24	EU Clinical Trials Register (EU-CTR)	2015-03-20					N		Y	N
No	101012/Z/13/Z	TOP-ART (Trauma Organ Protection - Artesunate)	Queen Mary University of London	Health Innovation Challenge Fund Award	2015-04-01	2019-11-30	ISRCTN15731357	ISRCTN Registry	2015-04-01	2019-09-21				N	Access subject to approvals by Principal Investigators	Y	Y
No	104802/Z/14/Z	Phase 1 trial: T4 immunotherapy of head and neck cancer.	King's College London	Translation Fund	2015-03-01	2020-04-01	NCT01818323	ClinicalTrials.gov	2015-06-01	2020-02-28				N	Y	N	N
No	104025/Z/14/Z	Peripheral Immunomarker Validation in Treatment-resistant Depression (BIODEP)	University of Cambridge	Strategic Award - Science	2015-01-18	2021-12-31	NCT02752178	ClinicalTrials.gov	2015-06-01	2018-09-30				N	Y	N	N
No	106698/Z/14/Z	Monitoring Pneumococcal Conjugate Vaccine Introduction in Cambodia	MORU	Africa and Asia Programmes	2015-01-01	2020-12-31	NCT03331952	ClinicalTrials.gov	2015-08-03	2018-08-31				N		N	N
No	203077/Z/16/Z	EBOVAC Salone	KEMRI	Africa and Asia Programmes	2015-01-01	2020-12-31	NCT02509494	ClinicalTrials.gov	2015-09-30	2019-08-02				N		N	N
No	103782/Z/14/Z	Identification and Prediction of Coronary Artery Plaque Rupture Using 18F-Fluoride Positron Emission Tomography (The PRE18FFIR Study)	University of Edinburgh	Investigator Award in Science	2015-01-01	2019-12-31	NCT02278211	ClinicalTrials.gov	2015-10-01	2020-06-30	Y	No	No	N	Not provided	Y	N
No	102538/Z/13/Z	Repurposing anti-TNF for Dupuytren's disease	University of Oxford	Health Innovation Challenge Fund Award	2015-03-01	2020-09-30	ISRCTN27786905	ISRCTN Registry	2015-10-12	2020-06-30				N	To be made available at a later date	Y	Y
No	106871/Z/15/Z	Health Impacts of a Climate Change Adaptation Strategy to Address Drinking-water Salinity in Coastal	International Centre for Diarrhoeal Disease Research	Sustaining Health Award	2016-03-01	2019-11-30	NCT02746003	ClinicalTrials.gov	2016-04-01	2019-04-30	Y	Yes	No	Submitted but returned by QC	Not provided	Y	Y
No	107499/Z/15/Z	CHMI-SIKA	University of Oxford	Strategic Award - Science	2015-11-01	2021-10-31	NCT02739763	ClinicalTrials.gov	2016-05-01	2018-06-13	Y	Yes	No	N	Study information will be made available through an open repository. The information to be made available will be anonymized so that there is no link to participants and will include data on antibody responses, parasite growth rates and any other data generated from samples obtained in this study, both generated from this current protocol or any future studies which will require additional ethica…	Y	N
No	107496/Z/15/Z	MYRIAD: My Resilience in Adolescence, a study examining the effectiveness and cost-effectiveness of	University of Oxford	Strategic Award - Science	2015-07-01	2022-06-01	ISRCTN86619085	ISRCTN Registry	2016-06-01	2021-12-31	Y	Yes	No	N	To be made available at a later date	Y	Y
No	106698/Z/14/Z	A randomised treatment trial of subclinical vivax infections with primaquine in Nong, Laos	MORU	Africa and Asia Programmes	2015-01-01	2020-12-31	NCT02802813	ClinicalTrials.gov	2016-06-14	2018-07-15				N		Y	N
No	106680/Z/14/Z	Parallel Group, Double Blinded, 1:1, Randomized Controlled Phase III Trial of Co-trimoxazole Versus	OUCRU	Africa and Asia Programmes	2015-01-01	2020-12-31	NCT02773407	ClinicalTrials.gov	2016-06-26	2019-05-31				N		Y	N
No	104803/Z/14/Z	Host directed therapies against tuberculosis	Imperial College London	Senior Research Fellowship Clinical Renewal	2014-10-01	2019-09-30	NCT02821832	ClinicalTrials.gov	2016-06-29	2022-12-30	Y	not listed	not listed	N	Not provided	N	N
No	106698/Z/14/Z	Molecular signature of Karen and Burmese pregnant women on the Thailand-Myanmar border	MORU	Africa and Asia Programmes	2015-01-01	2020-12-31	NCT02797327	ClinicalTrials.gov	2016-09-01	2019-03-31				N		N	N
No	107548/Z/15/Z	Bridging the critical policy-practice gap in radical treatment of vivax malaria in Afghanistan	University of Oxford	Research Training Fellowship in Public Health & Tropical Medicine	2016-03-01	2020-02-28	NCT02876549	ClinicalTrials.gov	2016-09-01	2018-12-01	Y	not listed	not listed	N	N	Y	Y
No	106698/Z/14/Z	Prevalence survey of Plasmodium Falciparum antimalarial drug resistance markers in Chad	MORU	Africa and Asia Programmes	2015-01-01	2020-12-31	NCT02895568	ClinicalTrials.gov	2016-09-16	2018-09-06				N		N	N
No	106698/Z/14/Z	Genetic epidemiology of P. falciparum malaria and associated antimalarial drug resistance	MORU	Africa and Asia Programmes	2015-01-01	2020-12-31	NCT03384498	ClinicalTrials.gov	2016-10-01	2019-10-31				N		N	N
No	106680/Z/14/Z	A Randomised Controlled Trial of Continuous Endotracheal Cuff Pressure Control for the Prevention of	OUCRU	Africa and Asia Programmes	2015-01-01	2020-12-31	NCT02966392	ClinicalTrials.gov	2016-11-01	2019-03-31				N		N	N
No	106698/Z/14/Z	Field Evaluation of a Device for Automated Malaria Microscopy	MORU	Africa and Asia Programmes	2015-01-01	2020-12-31	NCT02932072	ClinicalTrials.gov	2016-11-10	2018-11-30				N		N	N
No	106698/Z/14/Z	Pharmacokinetic Interactions of Orally Administered Artemether-lumefantrine, Amodiaquine and Primaqu	MORU	Africa and Asia Programmes	2015-01-01	2020-12-31	NCT02696954	ClinicalTrials.gov	2016-11-18	2019-12-31				N		N	N
No	203077/Z/16/Z	COAST	KEMRI	Africa and Asia Programmes	2015-01-01	2020-12-31	ISRCTN15622505	ISRCTN Registry	2016-12-01	2020-12-01						Y	N
No	106698/Z/14/Z	Epidemiology of malaria in Ubon Ratchathani, Thailand: a case-control study	MORU	Africa and Asia Programmes	2015-01-01	2020-12-31	NCT02991963	ClinicalTrials.gov	2016-12-01	2018-12-31				N		N	N
No	200796/Z/16/Z	A randomised controlled trial of therapist-assisted online psychological therapies for PTSD	University of Oxford	Principal Research Fellowship Renewal	2017-01-01	2022-04-01	ISRCTN16806208	ISRCTN Registry	2017-01-01	2021-12-31	Y	No	No	N	To be made available at a later date	Y	N
No	201486/Z/16/Z	IL-6 Inhibition in Patients with Depression and Low-grade Inflammation: The Insight Study	University of Cambridge	Intermediate Clinical Fellowship	2017-01-01	2021-01-01	ISRCTN16942542	ISRCTN Registry	2017-01-09	2021-05-31	Y	Yes	Yes	N	Access subject to approvals by Principal Investigators	Y	Y
No	110058/Z/15/Z	The NASIMMUNE study	Imperial College London	Intermediate Clinical Fellowship	2016-02-12	2020-02-23	NCT02972957	ClinicalTrials.gov	2017-01-30	2018-12-19	Y	No	No	N	N	N	N
No	106698/Z/14/Z	Single low dose primaquine in African children with acute falciparum malaria and G6PD deficiency	MORU	Africa and Asia Programmes	2015-01-01	2020-12-31	ISRCTN11594437	ISRCTN Registry	2017-02-01	2020-06-01						Y	N
No	205069/Z/16/Z	Integrating depression management in HIV care in Uganda	MRC/UVRI Uganda Research Unit on AIDS	Senior Research Fellowship in PH&TM	2017-02-02	2022-02-02	ISRCTN86760765	ISRCTN Registry	2017-02-02	2022-02-01				N	The MRC/UVRI Unit is committed to the principle of sharing data with bona fide researchers and has developed a data sharing policy (see link: http://www.mrcuganda.org/sites/default/files/publications/MRC_UVRI_Data_sharing_policy_December2015.pdf). The policy recognizes the need to make maximum use of data collected using public funding while protecting the intellectual property rights of the stud…	Y	N
No	106680/Z/14/Z	An Open Label, Non-comparative, Multicenter Study to Assess the Pharmacokinetics, Safety and Efficac	OUCRU	Africa and Asia Programmes	2015-01-01	2020-12-31	NCT02563496	ClinicalTrials.gov	2017-02-06	2019-09-30				N		N	N
No	106680/Z/14/Z	Intrathecal Immunoglobulin for treatment of adult patients with tetanus: a randomized controlled 2x2	OUCRU	Africa and Asia Programmes	2015-01-01	2020-12-31	NCT02999815	ClinicalTrials.gov	2017-02-13	2019-12-31				N		N	N
No	104803/Z/14/Z	Using Biomarkers to Predict TB Treatment Duration	Imperial College London	Senior Research Fellowship Clinical Renewal	2014-10-01	2019-09-30	NCT02880982	ClinicalTrials.gov	2017-03-14	2022-03-01	Y	not listed	not listed	N	Undecided	N	N
No	106680/Z/14/Z	A pilot study to assess shortened therapy for hepatitis C infected adults in Vietnam	OUCRU	Africa and Asia Programmes	2015-01-01	2020-12-31	ISRCTN17100273	ISRCTN Registry	2017-04-01	2020-11-30						N	N
No	106698/Z/14/Z	Molecular signature of Karen and Burmese children until two years of age, Thailand--Myanmar border	MORU	Africa and Asia Programmes	2015-01-01	2020-12-31	NCT03104673	ClinicalTrials.gov	2017-04-30	2019-04-30				N		N	N
No	106680/Z/14/Z	A randomized double blind placebo controlled trial of adjunctive dexamethasone for the treatment of	OUCRU	Africa and Asia Programmes	2015-01-01	2020-12-31	NCT03092817	ClinicalTrials.gov	2017-05-25	2020-04-01				N		N	N
No	110179/Z/15/Z	A Randomized Double Blind Placebo Controlled Trial of Adjunctive Dexamethasone for the Treatment of HIV-infected Adults With Tuberculous Meningitis	University of Oxford	Investigator Award in Science	2016-04-01	2023-04-01	NCT03092817	ClinicalTrials.gov	2017-05-25	2020-04-01				N	The Oxford University Clinical Research Unit recognizes the ethical obligation to ensure that optimal use is made of the data and specimens that the investigators collect for our research and the value of sharing individual level data. The investigators aim to ensure that data generated from all our research are collected, curated, managed and shared in a way that maximizes their benefit. When sh…	N	N
No	106698/Z/14/Z	Eschar investigations in scrub typhus (Chiang Rai, Thailand)	MORU	Africa and Asia Programmes	2015-01-01	2020-12-31	NCT02915861	ClinicalTrials.gov	2017-06-30	2019-06-30				N		N	N
No	206417/Z/17/Z	SNEHA-TARA pragmatic cluster randomised controlled trial	University College London	Senior Research Fellowship Clinical Renewal	2017-07-01	2022-07-01	ISRCTN84502355	ISRCTN Registry	2017-07-01	2022-06-30	Y	No	No	N	To be made available at a later date	Y	Y
No	106698/Z/14/Z	Causes and impact of anemia on pregnancy outcome on the Thai-Myanmar Border	MORU	Africa and Asia Programmes	2015-01-01	2020-12-31	NCT03174652	ClinicalTrials.gov	2017-07-20	2018-07-20				N		N	N
No	106680/Z/14/Z	A Phase 2 interventional, multicenter, randomized open-label study to determine the effective and to	OUCRU	Africa and Asia Programmes	2015-01-01	2020-12-31	NCT03167242	ClinicalTrials.gov	2017-08-02	2019-09-26				N		N	N
No	106698/Z/14/Z	Prevalence survey of plasmodium falciparum antimalarial drug resistance markers in greater mekong SR	MORU	Africa and Asia Programmes	2015-01-01	2020-12-31	NCT03217851	ClinicalTrials.gov	2017-08-18	2020-08-31				N		Y	N
No	106680/Z/14/Z	A randomized trial of Tamoxifen combined with amphotericin B and fluconazole for cryptococcal mening	OUCRU	Africa and Asia Programmes	2015-01-01	2020-12-31	NCT03112031	ClinicalTrials.gov	2017-10-10	2019-08-31				N		N	N
No	106698/Z/14/Z	The Scrub Typhus Antibiotic Resistance Trial (START)	KEMRI	Africa and Asia Programmes	2015-10-01	2020-09-30	NCT03083197	ClinicalTrials.gov	2017-10-15	2019-10-31				N	Undecided	N	N
No	106698/Z/14/Z	Plasmodium vivax infections presenting with severe symptoms from 2001 to 2013 in NW Thailand	MORU	Africa and Asia Programmes	2015-01-01	2020-12-31	NCT03307369	ClinicalTrials.gov	2017-10-27	2019-06-30				N		N	N
No	106698/Z/14/Z	Automated Malaria Microscopy: Parasite clearance estimation and cost effectivetiveness	MORU	Africa and Asia Programmes	2015-01-01	2020-12-31	TCTR20180802001	Thai Clinical Trials Registry (TCTR)	2017-11-01	2018-09-01				N		N	N
No	106698/Z/14/Z	Vulnerabilities & Abilities of Women & Families in Health Research on the Thai-Myanmar border	MORU	Africa and Asia Programmes	2015-01-01	2020-12-31	TCTR20180921001	Thai Clinical Trials Registry (TCTR)	2017-11-10	2020-05-10				N		Y	Y
No	200181/Z/15/Z	An Open-Label Extension Study to Evaluate the Safety, Tolerability, Pharmacokinetics, and Pharmacodynamics of RO7234292 (ISIS 443139) in Huntington's Disease Patients Who Participated in Prior Investigational Studies of RO7234292 (ISIS 443139)	University College London	Collaborative Award in Science	2016-07-01	2021-11-27	NCT03342053	ClinicalTrials.gov	2017-11-27	2019-10-11	Y	No	No	N	Not provided	N	N
No	106698/Z/14/Z	A multicentre observational study to describe the prevalence of scrub typhus in Mayanmar	MORU	Africa and Asia Programmes	2015-01-01	2020-12-31	NCT03269266	ClinicalTrials.gov	2017-12-04	2019-11-30				N		N	N
No	106698/Z/14/Z	Study to evaluate the Evaluate the bioequivalence of a new parenteral formulation of artesunate	MORU	Africa and Asia Programmes	2015-01-01	2020-12-31	TCTR20170907002	Thai Clinical Trials Registry (TCTR)	2018-01-22	2018-07-25				N		N	N
No	106698/Z/14/Z	An alternative regimen of primaquine as antirelapse in healthy volunteers with G6PD deficiency	MORU	Africa and Asia Programmes	2015-01-01	2020-12-31	TCTR20170830002	Thai Clinical Trials Registry (TCTR)	2018-01-25	2019-02-25				N		Y	N
No	206853/Z/17/Z	Cigarette pack size and consumption: a parallel group randomised controlled trial	University of Cambridge	Collaborative Award in Science	2018-01-02	2022-01-02	ISRCTN34202533	ISRCTN Registry	2018-02-01	2019-01-21	Y	Yes	Yes	N	The data will be made available for sharing via the University of Cambridge Research Data Repository or Open Science Framework online data repository once the findings have been published.	Y	Y
No	106698/Z/14/Z	Utility of Sepsis-3 definition in community-acquired sepsis in Ubon Ratchathani, Northeast Thailand	MORU	Africa and Asia Programmes	2015-01-01	2020-12-31	NCT03379402	ClinicalTrials.gov	2018-02-01	2020-06-30				N		N	N
No	110179/Z/15/Z	Leukotriene A4 hydrolase Stratified Trial of Adjunctive Corticosteroids for HIV-uninfected adults wi	University of Oxford	Investigator Award in Science	2016-04-01	2023-04-01	NCT03100786	ClinicalTrials.gov	2018-02-08	2021-12-02	Y	Yes	No	N	The Oxford University Clinical Research Unit recognizes the ethical obligation to ensure that optimal use is made of the data and specimens that the investigators collect for the research and the value of sharing individual level data. The investigators aim to ensure that data generated from all the research are collected, curated, managed and shared in a way that maximizes their benefit. When sh…	N	N
No	110179/Z/15/Z	LTA4H stratified trial of adjunctive dexamethasone for HIV uninfected adults with TB meningitis	University of Oxford	Investigator Award in Science	2016-04-01	2023-04-01	NCT03100786	ClinicalTrials.gov	2018-02-08	2021-12-01				N	The Oxford University Clinical Research Unit recognizes the ethical obligation to ensure that optimal use is made of the data and specimens that the investigators collect for the research and the value of sharing individual level data. The investigators aim to ensure that data generated from all the research are collected, curated, managed and shared in a way that maximizes their benefit. When sh…	N	N
No	106698/Z/14/Z	REducinG Antibiotics tReatment Duration for Ventilator-Associated Pneumonia (REGARD-VAP)	MORU	Africa and Asia Programmes	2015-01-01	2020-12-31	NCT03382548	ClinicalTrials.gov	2018-02-26	2021-06-30				N		N	N
No	106698/Z/14/Z	Outcome and risk factors associated with hospital-acquired antibiotic-resistant infections	MORU	Africa and Asia Programmes	2015-01-01	2020-12-31	NCT03411538	ClinicalTrials.gov	2018-03-01	2020-02-28				N		N	N
No	203077/Z/16/Z	YEFE	KEMRI	Africa and Asia Programmes	2016-10-01	2021-09-30	NCT03452475	ClinicalTrials.gov	2018-03-07	2020-02-19				N		N	N
No	106698/Z/14/Z	Vulnerabilities & Abilities of Women, Children, & Families in Health Research in Chiang Rai Province	MORU	Africa and Asia Programmes	2015-01-01	2020-12-31	TCTR20181024005	Thai Clinical Trials Registry (TCTR)	2018-03-13	2021-03-13				N		Y	Y
No	203077/Z/16/Z	NEOFOSFO	KEMRI	Africa and Asia Programmes	2015-01-01	2020-12-31	NCT03453177	ClinicalTrials.gov	2018-03-15	2018-12-30				N		Y	N
No	106680/Z/14/Z	Parallel Group, Double Blinded, 1:1, Randomized Controlled Phase III Trial of Co-trimoxazole Versus	KEMRI	Africa and Asia Programmes	2015-10-01	2020-10-01	NCT03355664	ClinicalTrials.gov	2018-03-19	2019-11-15				N		N	N
No	101011/Z/13/Z	Re-purposing of 13-cis-retinoic for children with neuroblastoma	Nova Laboratories Limited	Health Innovation Challenge Fund Award	2015-05-05	2020-08-31	NCT03291080	ClinicalTrials.gov	2018-04-17	2019-08-28				N	N	N	N
No	205222/Z/16/Z	Revitalising Informal Settlements and their Environments (RISE): Assessing health, social, and environmental outcomes following water-sensitive revitalisation of informal settlements in Indonesia and Fiji	Monash University	Our Planet, Our Health (Full)	2017-07-11	2022-07-11	ACTRN12618000633280	Australian New Zealand Clinical Trials Registry (ANZCTR)	2018-04-26	2022-08-01	Y	No	No	N	Access subject to approvals by Principal Investigators	Y	Y
No	106698/Z/14/Z	Improving SCBU care for preterm neonates	MORU	Africa and Asia Programmes	2015-01-01	2020-12-31	NCT03512093	ClinicalTrials.gov	2018-05-01	2019-05-31				N		N	N
No	202097/Z/16/Z	Mediterranean diet and cognitive decline: using epidemiologic and pilot study data to inform a large-scale intervention.	Queen's University Belfast	Seed Award in Science	2016-10-01	2019-03-31	NCT03569319	ClinicalTrials.gov	2018-05-18	2019-06-30				N	Undecided	Y	N
No	106698/Z/14/Z	Tenofovir to prevent mother-to-child transmission of hepatitis B virus (PMTCT-HBV)	MORU	Africa and Asia Programmes	2015-01-01	2020-12-31	NCT02995005	ClinicalTrials.gov	2018-05-24	2019-07-31				N		N	N
No	200901/Z/16/Z	Community-led delivery of HIV self-testing kits in Malawi	London School of Hygiene & Tropical Medicine	Senior Research Fellowship Clinical Renewal	2016-09-01	2021-09-01	NCT03541382	ClinicalTrials.gov	2018-06-01	2019-06-30	Y	No	No	N	Y	Y	N
No	106698/Z/14/Z	Fluid and vasopressor therapy in adult patients with severe malaria or severe sepsis	MORU	Africa and Asia Programmes	2015-01-01	2020-12-31	NCT03641534	ClinicalTrials.gov	2018-06-04	2019-09-30				N		N	N
No	106698/Z/14/Z	A cross-sectional study investigating prevalence of Melioidosis as a cause of pneumonia in Yangon	MORU	Africa and Asia Programmes	2015-01-01	2020-12-31	NCT03578133	ClinicalTrials.gov	2018-07-07	2019-04-11				N		Y	N
No	206575/Z/17/Z	A pragmatic randomised study to optimise screening, prevention and care for tuberculosis in Malawi (PROSPeCT Study)	Liverpool School of Tropical Medicine	Clinical Research Career Development Fellowship	2017-08-07	2022-08-07	NCT03519425	ClinicalTrials.gov	2018-08-01	2019-12-31	Y	Yes	Yes	N	We are strongly committed to ensuring that the trial datasets are made openly available, and that all code used in the analysis are published to allow fully reproducible research. The data collected by this research will be of importance to other researchers and the public, and could for example be used by other researchers conducting meta-analysis, or by policymakers modelling the potential retu…	Y	N
No	200439/Z/16/Z	A study to determine the safety and tolerability of graded doses of the drug LHF-535 (LHF-535-SDD) in healthy volunteers	Kineta Inc	Translation Fund	2016-04-29	2019-08-28	ACTRN12618001342202	Australian New Zealand Clinical Trials Registry (ANZCTR)	2018-08-07	2019-01-14				N	N	N	N
No	106919/A/15/Z	PRIDE (PRemIum for aDolEscents).	Harvard University	Principal Research Fellowship (New)	2017-04-01	2020-10-01	NCT03633916	ClinicalTrials.gov	2018-08-20	2018-12-15	Y	Yes	No	N	Undecided	N	N
No	106698/Z/14/Z	Pharmacokinetics and Pharmacodynamics of Ivermectin in Pediatric Dengue Patients (PKIDEN)	MORU	Africa and Asia Programmes	2015-01-01	2020-12-31	NCT03432442	ClinicalTrials.gov	2018-09-04	2019-07-31				N		N	N
No	106698/Z/14/Z	A clinical and PK study of Hepatitis C treatment (sofosbuvir+daclatasvir) in Myanmar	MORU	Africa and Asia Programmes	2015-01-01	2020-12-31	NCT03158857	ClinicalTrials.gov	2018-11-01	2021-12-31				N		N	N
No	106698/Z/14/Z	Randomized Controlled Trial of an Evidence-informed Parenting Intervention to Prevent Violence Again	MORU	Africa and Asia Programmes	2015-01-01	2020-12-31	NCT03539341	ClinicalTrials.gov	2018-12-11	2019-12-31				N		N	N
No	206316/Z/17/Z	Community based interventions to improve HIV outcomes in adolescents: a cluster randomised trial in Zimbabwe	London School of Hygiene & Tropical Medicine	Senior Research Fellowship Clinical	2017-10-01	2022-10-01	NCT 03719521	ClinicalTrials.gov	2019-01-01	2022-09-30	Y	No	No	N	Data will be placed in the London School of Hygiene and Tropical Medicine (LSHTM) research data repository. This repository will enable direct download of records with codebooks to enable replication of the data analyses. Data will be anonymised prior to release for data sharing. In addition, annotated questionnaires and STATA do-files used for data cleaning and analysis will be available. All da…	N	N
No	107212/A/15/Z	ITAD (Interleukin-2 Therapy of Autoimmunity in Diabetes)	University of Oxford	Strategic Award - Science	2016-10-01	2020-09-30	NCT03782636	ClinicalTrials.gov	2019-01-01	2021-07-31	Y	No	No	N	Undecided	N	N
No	106698/Z/14/Z	A study of the PK/PD properties of oral miltefosine for cutaneous leishmaniasis in Afghanistan	MORU	Africa and Asia Programmes	2015-01-01	2020-12-31	TCTR20180710007	Thai Clinical Trials Registry (TCTR)	2019-02-01	2020-11-01				N		N	N
No	106680/Z/14/Z	SURE: Short intensive treatment for children with tuberculous meningitis.	KEMRI	Africa and Asia Programmes	2015-10-01	2020-10-01	NCT03587389	ClinicalTrials.gov	2019-03-01	2020-12-31				N		Y	N
No	206331/Z/17/Z	TB043: Investigating immune responses to aerosol BCG challenge in healthy UK adults	University of Oxford	Investigator Award in Science	2017-07-01	2022-07-01	NCT03912207	ClinicalTrials.gov	2019-03-01	2020-12-31	Y	No	No	N	N	Y	N
No	203077/Z/16/Z	FPCV	KEMRI	Africa and Asia Programmes	2015-01-01	2020-12-31	NCT03489018	ClinicalTrials.gov	2019-03-30	2020-09-30				N		Y	N
Yes	207472/Z/17/Z	RCT of Natamycin vs. Chlorhexidine for the treatment of Fungal Keratitis	London School of Hygiene & Tropical Medicine	Senior Research Fellowship Clinical Renewal	2018-05-01	2023-05-01	ISRCTN14332621	ISRCTN Registry	2019-06-01	2019-12-31	Y	No	No	N		Y	N
No	106680/Z/14/Z	SURE: Short intensive treatment for children with tuberculous meningitis.	OUCRU	Africa and Asia Programmes	2015-01-01	2020-12-31	ISRCTN40829906	ISRCTN Registry	2019-09-01	2021-04-04						Y	N
No	103799/Z/14/Z	LUNGTESTLUNGTEST (Developing a Blood Test for Early Stage Lung Cancer)	Institute of Cancer Research	Investigator Award in Science	2015-01-01	2019-12-31	CCR 4190	Other
No	104613/Z/14/Z	Non-Blood Contacting Biventricular Cardiac Assist Device That Promotes Heart Restoration.	CorInnova	Translation Fund	2015-01-01	2020-01-30	Not started yet
No	200439/Z/16/Z	A study to determine the safety and tolerability of graded doses of the drug LHF-535 (LHF-535-SDD) in healthy volunteers, ascending doses	Kineta Inc	Translation Fund	2016-04-29	2019-08-28	Not started yet
No	106878/Z/15/Z	First-in-human trial of an optimised lentiviral vector for cystic fibrosis gene therapy	University of Edinburgh	Health Innovation Challenge Fund Award	2017-04-01	2022-12-31	Not started yet
No	206001/Z/16/Z	Mitochondrial DNA disorders: Is there a way to prevent transmission?	Newcastle University	Discretionary Award – Science	2017-05-01	2022-05-01	Not started yet				Y	No	No	N	No
No	200871/Z/16/Z	A new biology of clinical outcome in immune-mediated disease	University of Cambridge	Investigator Award in Science	2017-06-01	2022-06-01	Not started yet
No	206035/Z/17/Z	Clinical Validation of Optical Molecular Alveoscopy for the Immediate Bed-Side Diagnosis of Pneumonia in the Intensive Care Unit	University of Edinburgh	Translation Fund	2017-09-01	2021-08-31	Not started yet
No	207457/Z/17/Z	Analgesic efficacy and safety of fentanyl in infants	University of Oxford	Senior Research Fellowship Basic	2017-12-01	2022-12-01	Not started yet
No	206296/Z/17/Z	SouthEast Asian Research Collaboration in Hepatitis (SEARCH)	Imperial College London	Collaborative Award in Science	2018-03-01	2023-03-01	Not started yet
No	208872/Z/17/Z	A personalized medicine approach for beta-thalassemia patients: testing sirolimus in a first pilot clinical trial (sirthalaclin)	Rare Partners	Innovator Award	2018-03-01	2020-02-28	Not started yet
No	209492/Z/17/Z	AKR1C3 as a mediator of metabolic risk in polycystic ovary syndrome with androgen excess phenotype	University of Birmingham	Investigator Award in Science	2018-04-01	2023-04-01	Not started yet
Yes	210572/Z/18/Z	Deciphering AMD by deep phenotyping and machine learning	University of Southampton	Collaborative Award in Science	2019-01-01	2024-01-01	Not started yet
Yes	211433/Z/18/Z	Malawi Accelerated Research in Vaccines, Experimental and Laboratory Systems	Liverpool School of Tropical Medicine	Controlled Human Infection Models	2019-01-01	2023-12-31	Not started yet
Yes	210479/Z/18/Z	Using social networks to understand and intervene on HIV epidemic spread	University College London	Sir Henry Dale Fellowship	2019-01-01	2024-01-01	Not started yet
Yes	212265/Z/18/Z	Critical questions for dolutegravir-based ART in Africa	University of Cape Town	Investigator Award in Science	2019-01-02	2022-01-01	Not started yet
Yes	212346/Z/18/Z	21st Century Treatments for Sustainable Elimination of Leishmasiasis	Drugs for Neglected Diseases Initiative	Innovations Project Award	2019-01-25	2022-01-24	Not started yet
Yes	214374/Z/18/Z	Gonococcal vaccine initiative	University of Oxford	Collaborative Award in Science	2019-03-01	2023-02-28	Not started yet
Yes	211100/Z/18/Z	Use of 68Ga-DOTATATE PET to identify the “inflammatory phenotype” in cardiovascular disease: a clinical translational programme	University of Cambridge	Clinical Research Career Development Fellowship	2019-04-01	2024-04-01	Not started yet
Yes	212345/Z/18/Z	Establishing a Dengue Controlled Human Infection Model in Viet Nam	University of Oxford	Controlled Human Infection Models	2019-04-01	2022-04-01	Not started yet
Yes	215898/Z/19/Z	Entervax: Clinical Evaluation of a Bivalent Typhoid-Paratyphoid Enteric Fever Vaccine	Prokarium	Innovations Project Award	2019-04-01	2021-03-31	Not started yet
Yes	215688/Z/19/Z	Multi-dimensional Diagnostics for Rapid Detection of Infectious Diseases in Developing Countries	Imperial College London	Innovator Award	2019-04-01	2022-03-31	Not started yet
Yes	214321/Z/18/Z	Evaluation of novel therapeutic strategies to accelerate bacterial clearance and host recovery in disseminated HIV-associated tuberculosis	University of Cape Town	Senior Research Fellowship	2019-04-01	2024-03-31	Not started yet
Yes	214554/Z/18/Z	The development and feasibility trial of a complex intervention to improve AccesS to living-donor Kidney transplantation: the ASK trial	University of Bristol	Clinical Research Career Development Fellowship	2019-04-15	2023-04-15	Not started yet
Yes	215908/Z/19/Z	Diagnostics of Joints Using Magic Angle Directional Imaging	Imperial College London	Innovator Award	2019-05-01	2022-04-30	Not started yet
Yes	215633/Z/19/Z	The Peek Practice-based Evidence Framework	London School of Hygiene & Tropical Medicine	Collaborative Award in Science	2019-05-01	2024-04-30	Not started yet
Yes	215474/Z/19/Z	Duration of immunity 10 years after a yellow fever vaccine dose-response study – a complementary study	Oswaldo Cruz Foundation	DFID-Wellcome Epidemic Preparedness Grant	2019-05-01	2020-08-01	Not started yet
Yes	214207/Z/18/Z	Evaluating the impact of a Lao language mobile phone antimicrobial use guideline application on antimicrobial prescribing in Laos	University of Oxford	International Training Fellowship - Full	2019-05-01	2022-05-01	Not started yet
Yes	215983/Z/19/Z	Next Generation T-cell therapies for CMV post-allogeneic stem cell transplant	University College London	Innovator Award	2019-06-01	2021-05-31	Not started yet
Yes	215674/Z/19/Z	Evidence Based Targeted Water, Sanitation, and Hygiene Interventions to Reduce Cholera in Hotspots in the Democratic Republic of the Congo	Johns Hopkins Bloomberg School of Public Health	DFID-Wellcome Epidemic Preparedness – Cholera Grant	2019-07-01	2021-06-30	Not started yet
Yes	215471/Z/19/Z	Optimising AVATAR therapy for distressing voices: a multi-centre randomised controlled trial	King's College London	Innovations Project Award	2019-07-01	2023-02-28	Not started yet
Yes	216060/Z/19/Z	The Cannabidiol Early Psychosis Project: A Randomised Controlled Trial	University of Melbourne	Innovations Project Award	2019-07-01	2023-06-30	Not started yet
Yes	215843/Z/19/Z	LAMP – REP: Learn, Assess, Manage, Prevent for Relapse in Early Psychosis	Beth Israel Deaconess Medical Centre	Innovator Award: Digital Technologies	2019-07-01	2021-06-30	Not started yet
Yes	212176/Z/18/Z	Malaria exposure, emergency care and severe disease phenotypes in African children	University of Oxford	Principal Research Fellowship Renewal	2019-08-01	2024-07-31	Not started yet
Yes	215619/Z/19/Z	Deep conditioning using CRISPR edited T cells	University College London	Collaborative Award in Science	2019-09-01	2023-08-31	Not started yet
Yes	216005/Z/19/Z	STEP - Stratification and Treatment in Early Psychosis	King's College London	Innovations Project Award	2019-10-01	2024-09-30	Not started yet
Yes	215524/Z/19/Z	The evaluation and development of novel diagnostic methods to understand and prevent placentally-related complications of human pregnancy	University of Cambridge	Investigator Award in Science	2019-10-01	2025-03-31	Not started yet
No	097922/Z/11/Z	Cambridge Stem Cell Institute.	University of Cambridge	Wellcome Trust Centre	2012-07-01	2018-06-30	No information
No	103383/Z/13/Z	PURAK: Wearable Devices for Distal Arm Functionality Rehabilitation.	Indian Institute of Science	Affordable Healthcare in India Award	2014-06-01	2019-02-07	No information
No	103383/B/13/Z	PURAK: Wearable Devices for Distal Arm Functionality Rehabilitation.	University of Oxford	Affordable Healthcare in India Award	2014-06-01	2019-02-07	No information
No	106329/Z/14/Z	Development of a small molecule inhibitor of EBNA1 to treat Epstein-Barr Virus (EBV) latent infection and associated disease	Wistar Institute	Seeding Drug Discovery Award	2014-11-15	2019-03-31	No information
No	102028/Z/13/Z	Clinical Development of a Therapeutic Vaccine for Tuberculosis.	Infectious Disease Research Institute	Translation Fund	2015-01-22	2023-05-31	No information
No	104249/Z/14/Z	Development of a small molecule therapeutic for the orphan disease Creatine Transporter Deficiency, an inborn error of metabolism and autism spectrum disorder.	Lumos Pharma	Translation Fund	2015-03-16	2018-08-01	No information
No	105828/Z/14/Z	PArtner-provided HIV Self-Testing and Linkage (PASTAL) in antenatal care clinics: methodology and delivery of an adaptive cluster-randomised trial in Blantyre, Malawi.	Liverpool School of Tropical Medicine	International Training Fellowship - Full	2015-04-01	2018-09-30	No information
No	107367/Z/15/Z	Improving the management and prevention of tetanus in Vietnam.	University of Oxford	Career Re-Entry Fellowship	2015-08-01	2020-07-31	No information
No	093956/Z/10/B	Improving the treatment of malaria.	University of Oxford	Principal Research Fellowship Renewal	2015-08-01	2021-10-01	No information
No	103386/Z/13/Z	Evaluating the efficacy and safety of an innovative and affordable goat lung surfactant for the treatment of respiratory distress syndrome in preterm neonates: a multi-site randomized clinical trial .	All India Institute of Medical Sciences Bhopal	Affordable Healthcare in India Award	2015-08-15	2018-12-09	No information
No	102567/Z/13/Z	GOLD imaging in acute stroke: further technology development incorporating a perfluorocarbon oxygen carrier (Oxycyte)	Aurum Biosciences Limited	Health Innovation Challenge Fund Award	2015-09-17	2020-04-30	No information
No	108518/Z/15/Z	A Phase IIa/IIb clinical trial to evaluate the therapeutic efficacy of ChAd63-KH vaccine in patients with persistent post kala-azar dermal leishmaniasis (PKDL).	University of York	Translation Fund	2016-01-01	2021-12-31	No information
No	106946/Z/15/Z	Bioactive Nanofibrous Sutures To Enhance Endogenous Repair Of Rotator Cuff Tears	University of Oxford	Health Innovation Challenge Fund Award	2016-02-01	2023-10-01	No information
No	110371/Z/15/Z	Small molecule inhibitors of the anti-apoptotic protein FLIP for the treatmentof cancer.	Queen's University Belfast	Seeding Drug Discovery Award	2016-03-29	2019-10-31	No information
No	106944/Z/15/Z	Magnetic Resonance Guided Ablation System for Treatment of Ventricular Tachycardia (MR-GAST-VT)	King's College London	Health Innovation Challenge Fund Award	2016-04-01	2020-12-30	No information
No	200134/Z/15/Z	Pre-clinical development of a stem cell based gene therapy protocol and clinical proof of principle for Duchenne Muscular Dystrophy	University of Manchester	Health Innovation Challenge Fund Award	2016-06-01	2022-05-31	No information
No	200116/Z/15/Z	Randomised controlled trial of early kangaroo mother care for hospitalised neonates <2000g in a low-income country	London School of Hygiene & Tropical Medicine	Research Training Fellowship	2016-07-01	2020-08-01	No information
No	200145/Z/15/Z	Next generation engineered T-cell therapy for brain lymphoma	University College London	Health Innovation Challenge Fund Award	2016-09-01	2021-03-30	No information
No	201495/Z/16/Z	Identifying Interventions to Prevent and Manage Chronic Kidney Disease	National University of Ireland Galway	Postdoctoral Training Fellowship for Clinicians	2016-09-01	2018-09-01	No information
No	109071/Z/15/A	Stress effects on Brain Connectivity	University of Bristol	PhD Studentship (Basic)	2016-10-01	2019-09-30	No information
No	109071/Z/15/A	Stress effects on Brain Connectivity	University of Bristol	PhD Studentship (Basic)	2016-10-01	2019-12-31	No information
No	200450/Z/16/Z	Development of a novel effective and safe intravenous drug for acute cardioversion of atrial fibrillation (AF)	Acesion Pharma	Translation Fund	2016-10-28	2020-07-28	No information
No	200796/Z/16/A	Advancing cognitive therapy for anxiety disorders and PTSD	University of Oxford	Investigator Award in Science	2017-01-01	2022-04-02	No information
No	106939/Z/15/Z	Repair of Acute Respiratory Distress Syndrome by Stromal Cell Administration (REALIST)	Queen's University Belfast	Health Innovation Challenge Fund Award	2017-03-01	2020-05-31	No information
No	106878/C/15/Z	First-in-human trail of an optimised lentiviral vector for cystic fibrosis gene therapy	Imperial College London	Health Innovation Challenge Fund Award	2017-04-01	2022-12-31	No information
No	106878/B/15/Z	First-in-human trail of an optimised lentiviral vector for cystic fibrosis gene therapy	University of Oxford	Health Innovation Challenge Fund Award	2017-04-01	2022-12-31	No information
No	207813/Z/17/Z	KAE609 Malaria Review	Novartis Pharma AG	Translation Fund	2017-04-01	2020-03-31	No information
No	205256/Z/16/Z	Novel inhibitors of MAP4K4 (HGK), an acute therapy to prevent cardiac muscle cell death following myocardial infarction	Imperial College London	Seeding Drug Discovery Award	2017-05-01	2020-01-31	No information
No	203493/Z/16/Z	Beating the drum – unique acoustically optimised silk fibroin blended bio-membranes for treatment of chronic middle ear diseases.	Ear Science Institute Australia	Translation Fund	2017-06-26	2020-09-24	No information
No	205228/Z/16/Z	Understanding cross-reactive immunity to Japanese encephalitis virus	University of Liverpool	Clinical Research Career Development Fellowship	2017-07-01	2020-01-01	No information
No	206589/Z/17/Z	Reducing risk of recurrent stroke and cognitive decline after TIA and stroke through characterisation and treatment of novel physiological markers	University of Oxford	Clinical Research Career Development Fellowship	2017-08-01	2021-08-01	No information
No	203481/Z/16/Z	MENSA - An innovative antimalarial treatment – Proof of Efficacy in Malaria Human Challenge Model	Merck KGaA	Translation Fund	2017-08-18	2019-03-31	No information
No	206275/Z/17/Z	Stronger SAFE - Cluster Randomised Trial of enhanced antibiotic and transmission supporession for tr	London School of Hygiene & Tropical Medicine	Collaborative Award in Science	2017-09-01	2022-09-01	No information
No	207504/Z/17/Z	Role of ATP in Chronic Cough	Imperial College London	Investigator Award in Science	2017-09-01	2022-08-31	No information
No	210772/Z/18/Z	Improving diagnosis and treatment of TB meningitis	London School of Hygiene & Tropical Medicine	PhD Training Fellowship for Clinicians	2017-09-01	2020-08-31	No information
No	205291/Z/16/Z	Development of selective Adrenomedullin-2 receptor antagonists for treatment of pancreatic cancer	University of Sheffield	Seeding Drug Discovery Award	2017-09-01	2019-08-31	No information
No	211166/Z/18/Z	Co-evolution of tumour mutational and CD4 T-cell differentiation landscapes	University College London	PhD Training Fellowship for Clinicians	2017-09-04	2020-09-03	No information
No	203764/Z/16/A	Immune responses of initially naïve human hosts to repeated infection with blood-stage Plasmodium vivax.	University of Edinburgh	PhD Studentship (Basic)	2017-10-01	2020-09-30	No information
No	203853/Z/17/A	High dose iminosugar treatment: Investigation of a new antiviral mechanism of action	University of Oxford	PhD Studentship (Basic)	2017-10-01	2020-09-30	No information
No	203966/Z/16/A	Therapeutic manipulation of the stromal compartment in colorectal cancer	University of Oxford	PhD Studentship (Basic)	2017-10-01	2020-09-30	No information
No	211022/Z/18/Z	Social anxiety in adolescents: Testing aspects of the cognitive model and developing an Internet version of Cognitive Therapy.	University of Oxford	PhD Training Fellowship for Clinicians	2017-10-01	2020-09-30	No information
No	204998/Z/16/Z	Transforming the screening, diagnosis and treatment of prostate cancer	Imperial College London	Senior Research Fellowship Clinical	2017-10-01	2022-09-30	No information
No	211025/Z/18/Z	Dissociation: Developing a Cognitive Maintenance Model and Psychological Intervention	University of Oxford	PhD Training Fellowship for Clinicians	2017-10-02	2020-10-01	No information
No	210793/Z/18/Z	Developing and piloting an interventional bundle to reduce mortality from gastroschisis in low-resource settings and identifying priority congenital anomalies for further interventional studies.	London School of Hygiene & Tropical Medicine	PhD Training Fellowship for Clinicians	2017-10-04	2020-10-03	No information
No	206498/Z/17/Z	Optical Characterisation of Epithelial Tissue Function and Metabolism for Early Cancer Diagnosis and Treatment Monitoring	University of Surrey	Career Re-Entry Fellowship	2017-10-06	2021-10-06	No information
No	200448/Z/16/Z	Personalised Therapy in Crohn's Disease	PredictImmune Ltd	Translation Fund	2017-12-11	2021-12-10	No information
No	208925/Z/17/Z	Prevention of Gestational Diabetes in Obese Pregnant Women; a Proof of Principle Study Targeting Early Pregnancy Intervention to Women at Risk.	King's College London	Seed Award in Science	2018-01-03	2020-01-02	No information
No	207504/B/17/Z	Cough Central: central nervous system in chronic cough	University of Manchester	Investigator Award in Science	2018-01-08	2023-01-08	No information
No	211475/Z/18/Z	Manufacturing and clinical development of a 4-valent bioconjugate Shigella vaccine	GlaxoSmithKline Biologicals SA	Innovations Project Award	2018-03-04	2021-03-03	No information
No	208870/Z/17/Z	The Women-2 Trial -Tranexamic acid for preventing postpartum haemorrhage	London School of Hygiene & Tropical Medicine	Innovations Project Award	2018-03-21	2022-09-30	No information
No	208970/Z/17/Z	KarXT: A potential novel mechanism antipsychotic and procognitive therapeutic	Karuna Pharmaceuticals Inc	Innovations Project Award	2018-04-13	2020-04-11	No information
Yes	215695/Z/19/Z	Saving young lives: Triage and management of sepsis in children using the point-of-care Paediatric Rapid Sepsis Trigger (PRST) tool	University of British Columbia	Innovator Award: Digital Technologies	2018-05-01	2020-04-30	No information
Yes	212399/Z/18/Z	Clinical development of a Novel, Live, Attenuated Oral Combination Shigella/ETEC Vaccine	EveliQure Biotechnologies GmbH	Innovator Award	2018-06-04	2020-06-03	No information
Yes	210755/Z/18/Z	Disorders of Thyroid Hormone Action: Diagnosis, Pathophysiology and Therapy	University of Cambridge	Investigator Award in Science	2018-08-01	2023-08-01	No information
Yes	203481/Z/16/Z	MENSA - An innovative antimalarial treatment – Proof of Efficacy in Malaria Human Challenge Model	Merck KGaA	Translation Fund	2018-08-18	2019-08-30	No information
Yes	209943/Z/17/Z	Interaction between omeprazole and gliclazide in CYP2C19 normal/ ultrarapid metabolisers	Faculty of Pharmacy University of Sarajevo	Seed Award in Science	2018-09-07	2020-09-07	No information
Yes	214626/Z/18/Z	Ebola East DRC August 2018	University of Oxford	DFID-Wellcome Epidemic Preparedness Grant	2018-10-01	2019-10-01	No information
Yes	215113/Z/18/Z	Investigating effectiveness and cost-effectiveness of sugar-reduction population-level interventions and policies	University of Sheffield	PhD Studentship (Basic)	2018-10-01	2021-09-30	No information
Yes	209198/Z/17/Z	The development of insulin resistance and anabolic resistance during muscle disuse: what is the role of fuel integration?	University of Exeter	Sir Henry Wellcome Postdoctoral Fellowship	2018-10-01	2022-10-01	No information
Yes	209589/Z/17/Z	Examining physiological hypoxia at menstruation to define the mechanisms that underpin endometrial resilience and heavy menstrual bleeding	University of Edinburgh	Clinical Research Career Development Fellowship	2018-11-01	2023-10-31	No information
Yes	212336/Z/18/Z	Plasmodium vivax Volunteer Infection Studies in Thailand	University of Oxford	Controlled Human Infection Models	2018-11-01	2023-11-01	No information
							No information

## Sheet: Data dictionary
Variable	Definition
Required to comply with May18 policy	Was the grant awarded on or after 1st May 2018
Grant code	Unique code allocated by Wellcome
Trial Title	Title of the trial either from application or registry
Grantholder Organisation	Host institution where grantholder is employed
Grant Type	Wellcome grant category
Grant Start Date	Grant start date from Wellcome database
Grant End Date	Grant End Date from Wellcome database
Trial registry ID	Trial registry ID as reported by grantholder
Trial registry	Trial registry
Trial start date	Trial start date from registry entry
Trial end date	Trial end date from registry entry
APR or EoG report 2018-19	Annual progress report or End of Grant report completed and submitted to Wellcome for 2018-19
Protocol available	Grantholder reported to Wellcome that the protocol is published publically
SAP available	Grantholder reported to Wellcome that the SAP is published publically
Summary results posted	Summary results are available on the registry where the trial is registered
Plan to share IPD	Plan to share individual patient/participant data as written on registry entry or report to Wellcome
Wellcome listed as a funder/collaborator on registry?	Wellcome listed as a funder/collaborator on the trial registry entry
Grant no listed on registry?	Wellcome unqiue grant code listed on the trial registry entry
